# Supplementary material for: (−)-Methyl-Oleocanthal, a New Oleocanthal Metabolite Reduces LPS-Induced Inflammatory and Oxidative Response: Molecular Signaling Pathways and Histones Epigenetic Modulation
Source: MDPI journal article supplement (doi:10.3390/antiox11010056), 2021-12-27
Supplement: s1 [file s1]

## Supplementary materials

### Table of contents

1. Synthesis of diazomethane's precursor
2. Western Blotting
3. Calibration curves
4. Spectroscopy data of OLE, met-OLE and methyl-ligustroside

#### 1. Synthesis of diazomethane's precursor

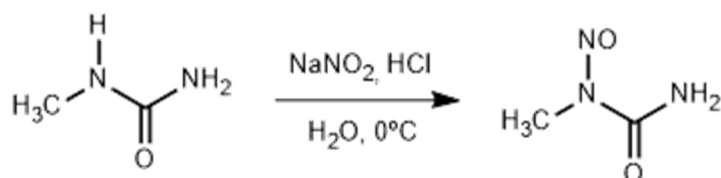

The synthesis of diazomethane's precursor was achieved following a reported procedure (Huang *et al.*, 2016). A mixture of *N*-methylurea (14.8 g),  $\text{NaNO}_2$  (15.2 g) and water (120 mL) was stirred until dissolution of products. Next, the mixture was cooled to  $0^\circ\text{C}$  and concentrated  $\text{HCl}$  (26 mL) was added dropwise for 1 h. The mixture was left to stir for 30 minutes to  $0^\circ\text{C}$ . Finally, the resulting precipitate was filtered, washed with cooled water (20 mL), and dried under vacuum. As a result, a beige solid was obtained (14.4 g, 70% yield).

Huang, Z.; Huang, X.; Li, B.; Mou, C.; Yang, S.; Song, B.A.; Chi, Y.R. Access to P-stereogenic phosphinates via *N*-heterocyclic carbene-catalyzed desymmetrization of bisphenols. *J. Am. Chem. Soc.* **2016**, *138*, 7524–7527, doi: 10.1021/jacs.6b04624.

## 2. Western Blotting

| Antibody   | Dilution | Source                                          |
|------------|----------|-------------------------------------------------|
| iNOS       | 1:1000   | Cell Signaling Technology® (Danvers, MA, USA)   |
| COX-2      | 1:1000   | Cell Signaling Technology® (Danvers, MA, USA)   |
| mPGES-1    | 1:1000   | Abcam® (Cambridge, UK)                          |
| p-P38      | 1:1000   | Cell Signaling Technology® (Danvers, MA, USA)   |
| P38        | 1:1000   | Cell Signaling Technology® (Danvers, MA, USA)   |
| p-ERK      | 1:1000   | Cell Signaling Technology® (Danvers, MA, USA)   |
| ERK        | 1:1000   | Cell Signaling Technology® (Danvers, MA, USA)   |
| p-JNK      | 1:1000   | Cell Signaling Technology® (Danvers, MA, USA)   |
| JNK        | 1:1000   | Cell Signaling Technology® (Danvers, MA, USA)   |
| Nrf-2      | 1:1000   | Cell Signaling Technology® (Danvers, MA, USA)   |
| HO-1       | 1:1000   | Enzo Life Sciences® (Inc. Farmingdale, NY, USA) |
| NLRP3      | 1:1000   | Cell Signaling Technology® (Danvers, MA, USA)   |
| ASC        | 1:1000   | Cell Signaling Technology® (Danvers, MA, USA)   |
| IL-18      | 1:1000   | Abcam® (Cambridge, UK)                          |
| Caspase-1  | 1:1000   | Novus Biologicals®, Littleton, CO, USA          |
| Caspase-11 | 1:1000   | Novus Biologicals®, Littleton, CO, USA          |
| H3         | 1:1000   | Cell Signaling Technology® (Danvers, MA, USA)   |
| H3K18ac    | 1:1000   | Cell Signaling Technology® (Danvers, MA, USA)   |
| H3K27me3   | 1:1000   | Cell Signaling Technology® (Danvers, MA, USA)   |
| H3K9me3    | 1:1000   | Cell Signaling Technology® (Danvers, MA, USA)   |
| β-Actin    | 1:2500   | Abcam® (Cambridge, UK)                          |

### 3. Calibration curves

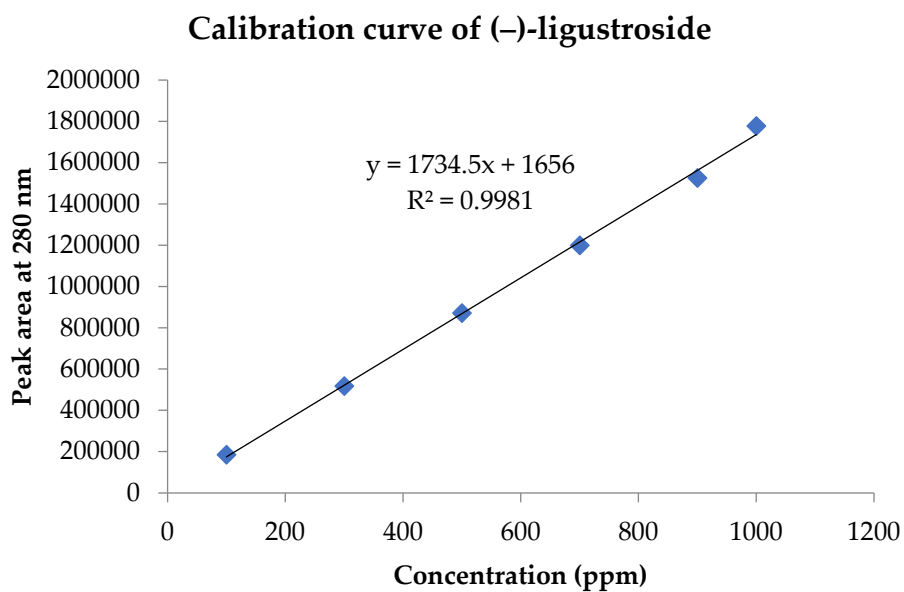

**Graphic S1.** Peak area at 280 nm vs (-)-ligustroside concentration (ppm).

**Table S1.** Concentration of prepared solutions of (-)-ligustroside and their peak area values at 280 nm.

| (-)-Ligustroside concentration (ppm) | Peak area at 280 nm |
|--------------------------------------|---------------------|
| 100                                  | 185383              |
| 300                                  | 518516              |
| 500                                  | 871968              |
| 700                                  | 1200114             |
| 900                                  | 1526396             |
| 1000                                 | 1778304             |

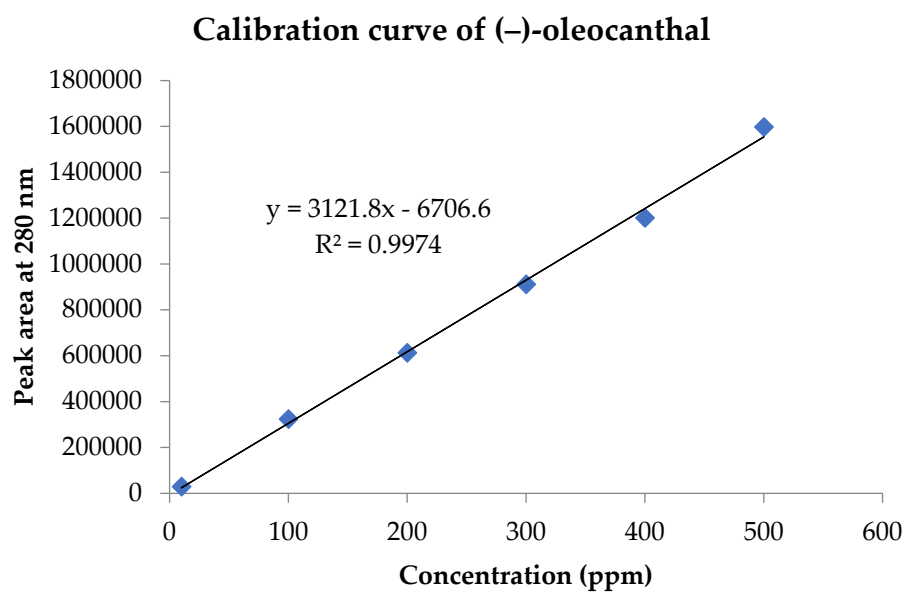

**Graphic S2.** Peak area at 280 nm vs (–)-oleocanthal concentration (ppm).

**Table S2.** Concentration of prepared solutions of (–)-oleocanthal and their peak area values at 280 nm.

| (–)-Oleocanthal concentration (ppm) | Peak area at 280 nm |
|-------------------------------------|---------------------|
| 10                                  | 28987               |
| 100                                 | 323681              |
| 200                                 | 612313              |
| 300                                 | 911136              |
| 400                                 | 1200596             |
| 500                                 | 1596912             |

#### 4. Spectroscopy data of OLE, met-OLE and methyl-ligustroside

(-)-Oleocanthal (OLE)

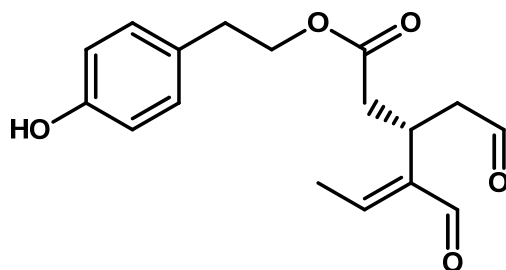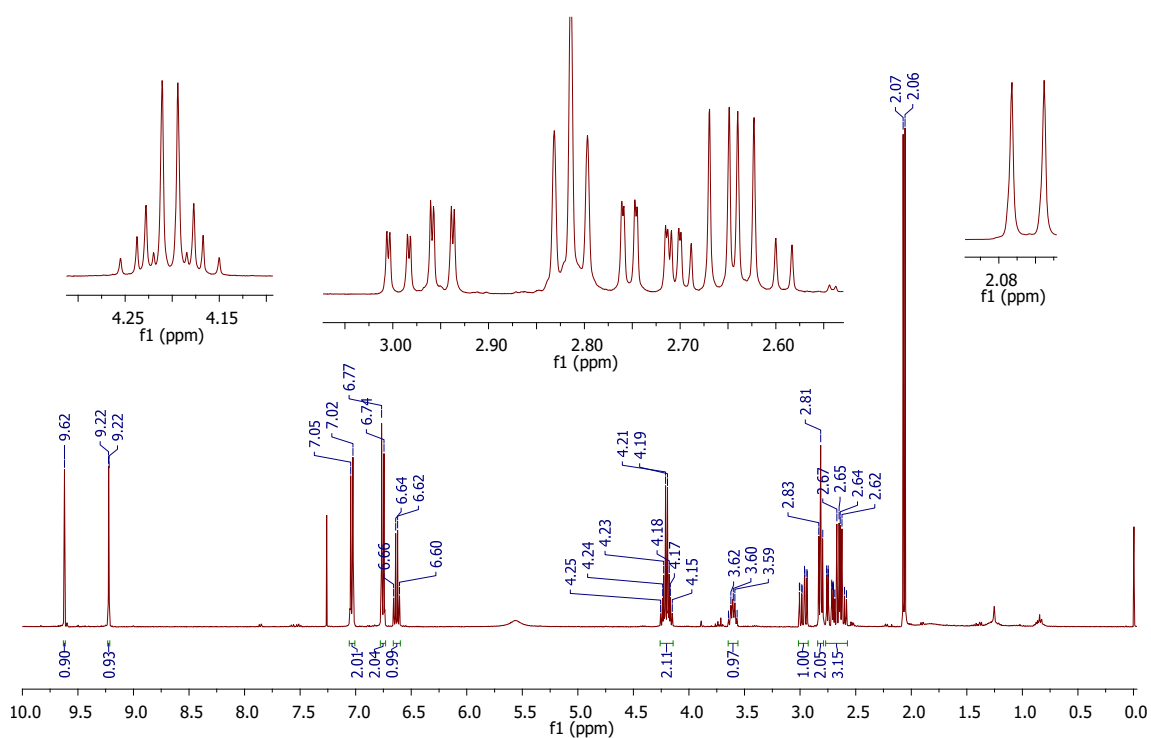

Figure S1. <sup>1</sup>H NMR of (-)-oleocanthal in deuterated chloroform.

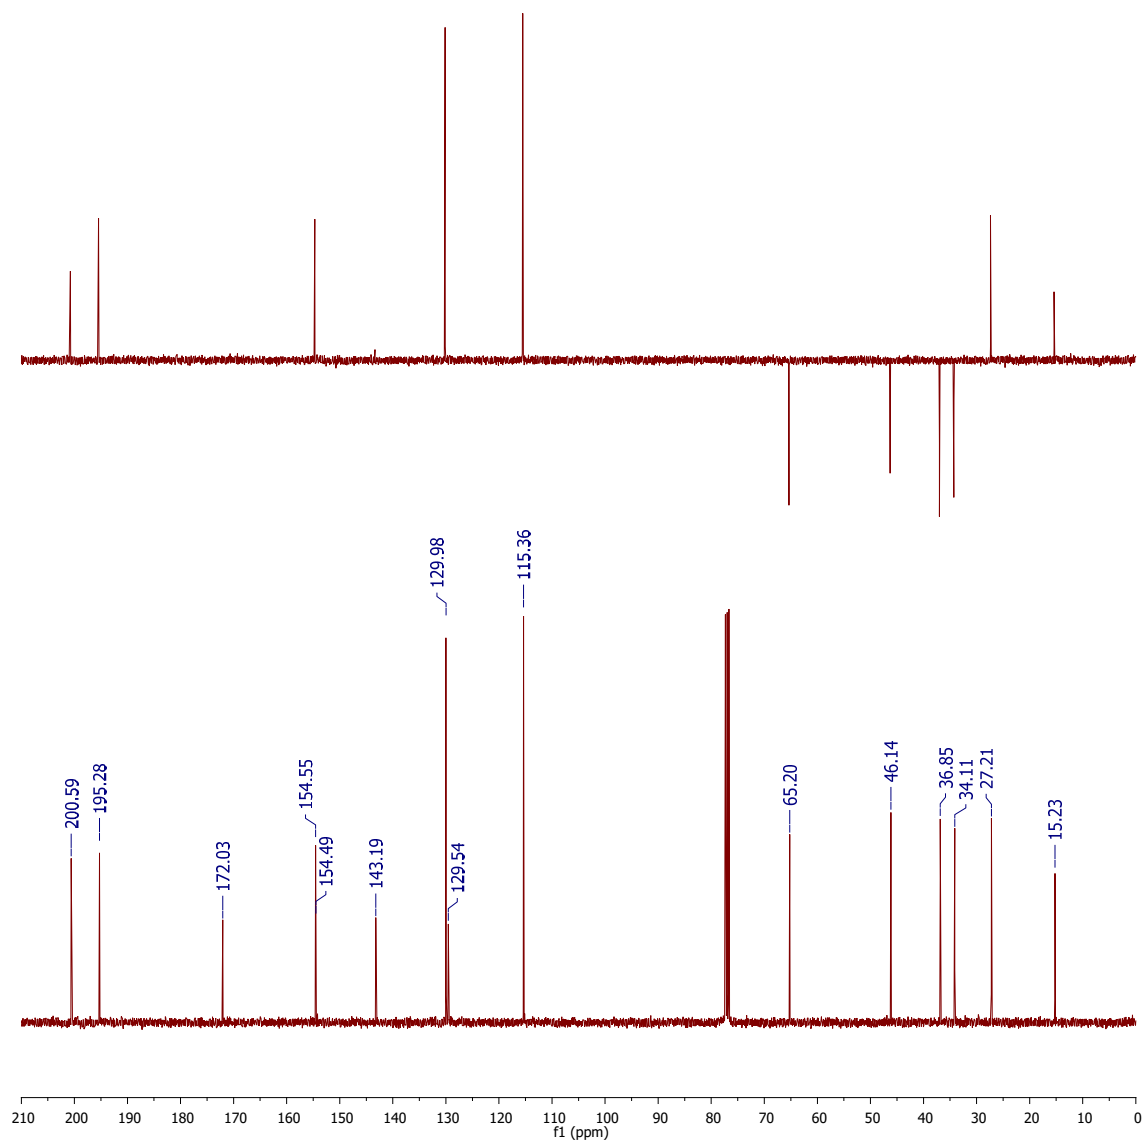

**Figure S2.** <sup>13</sup>C NMR (bottom) and Dept-135 (top) of (-)-oleocanthal in deuterated chloroform.

(-)-Methyl-oleocanthal (**Met-OLE**)

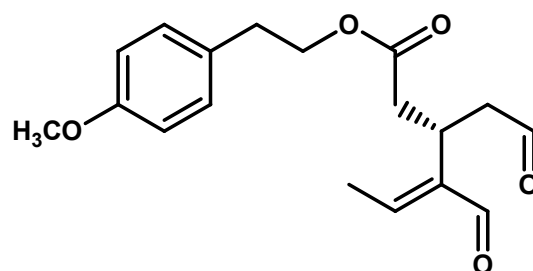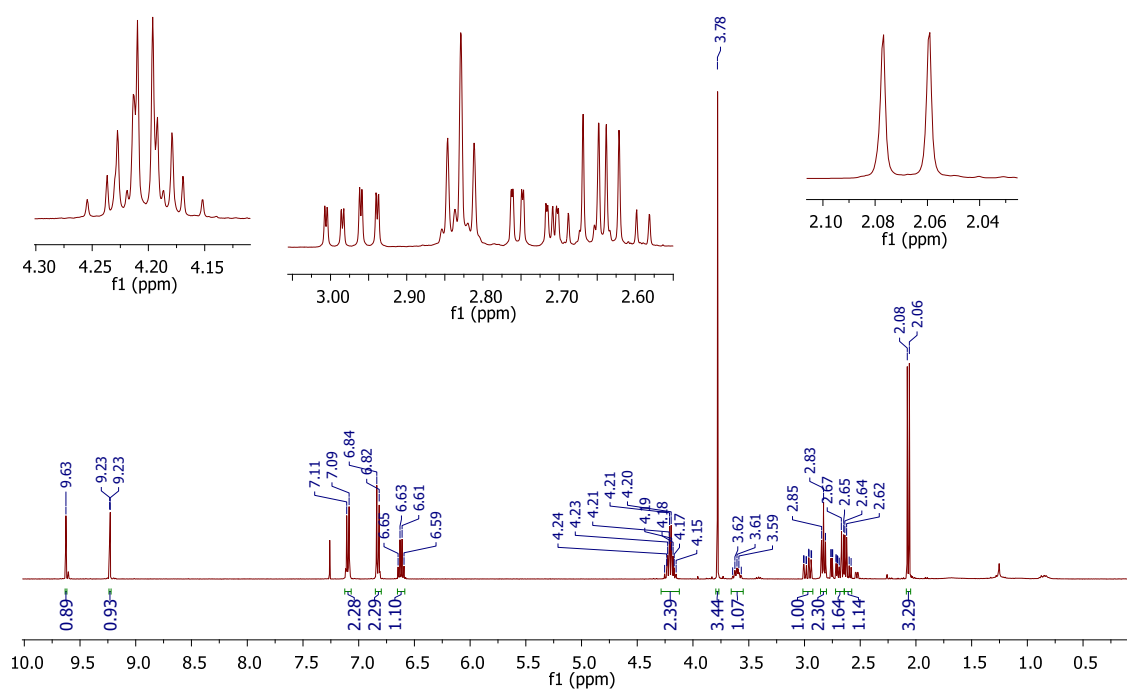

**Figure S3.** <sup>1</sup>H NMR of (-)-methyl-oleocanthal (**Met-OLE**) in deuterated chloroform.

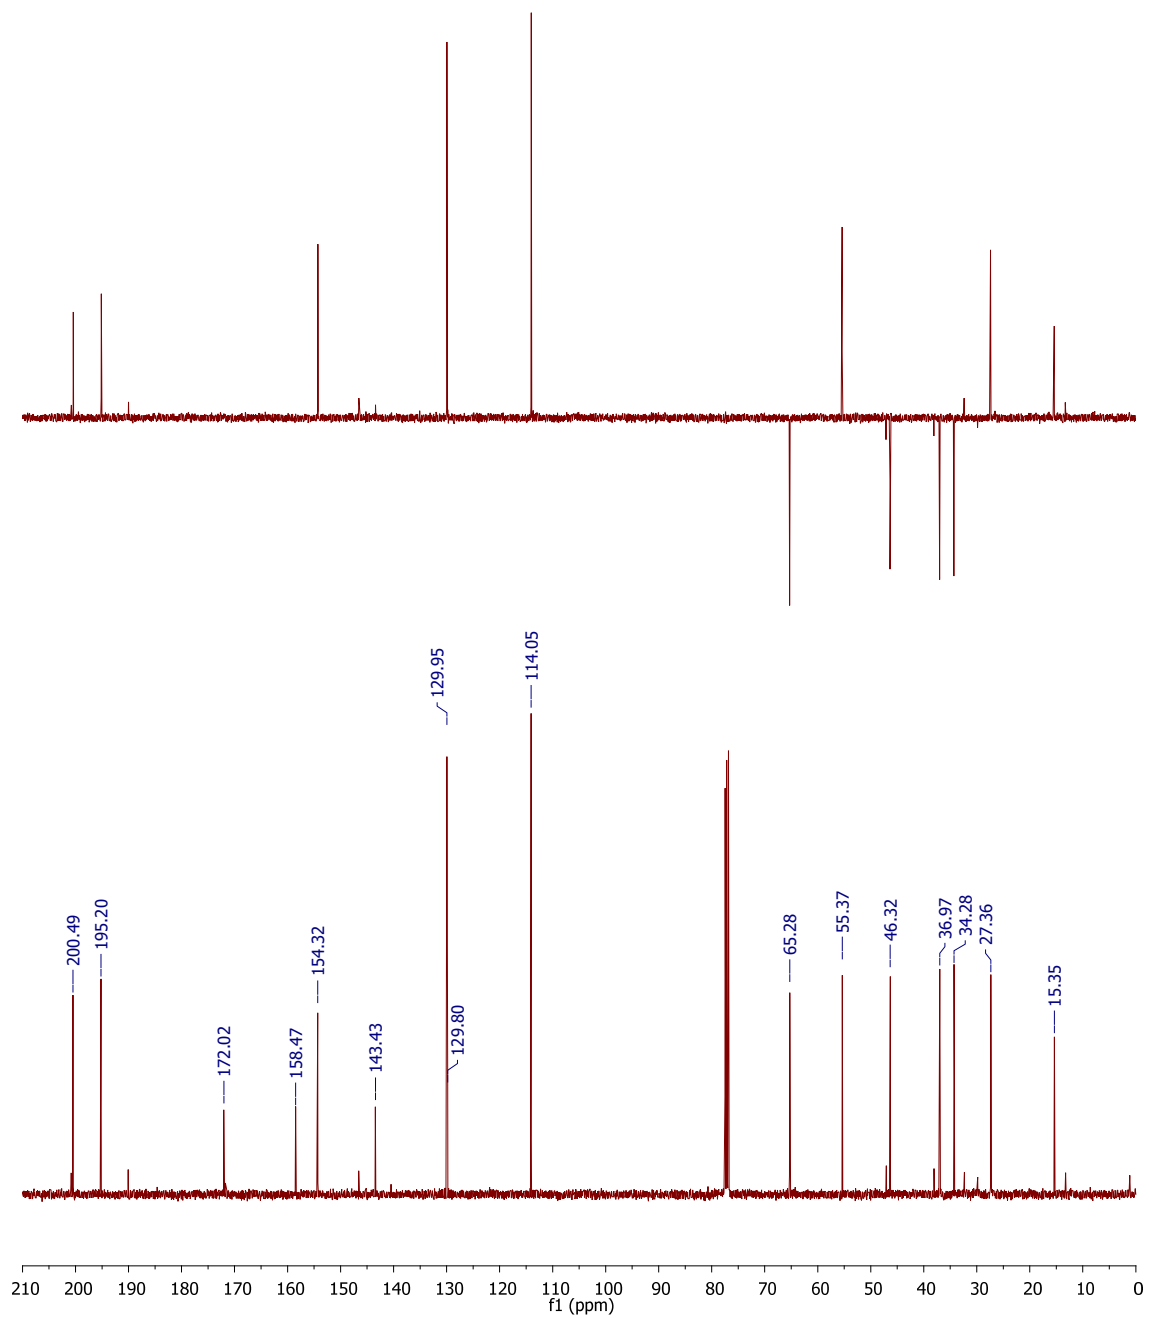

**Figure S4.** <sup>13</sup>C NMR (bottom) and DEPT-135 (top) of (-)-methyl-oleocanthal (**Met-OLE**) in deuterated chloroform.



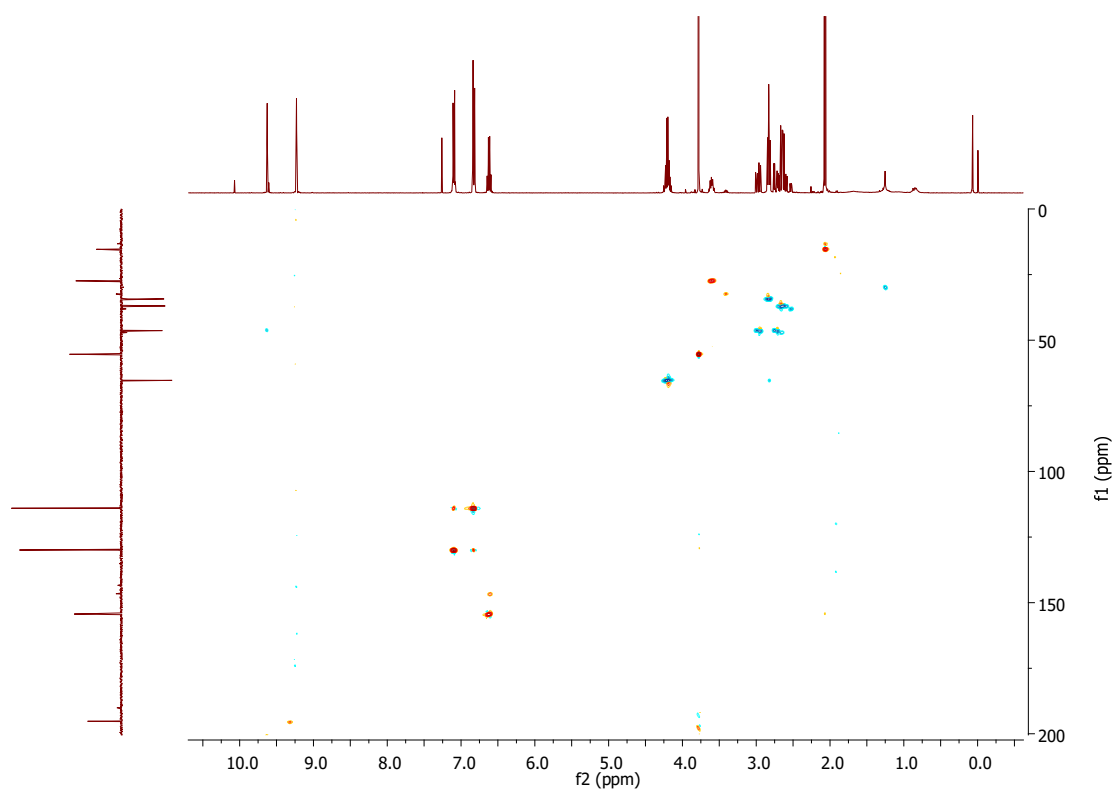

**Figure S5.**  $^1\text{H}$ -Dept-135 (HSQC) of (-)-methyl-oleocanthal (**Met-OLE**) in deuterated chloroform.

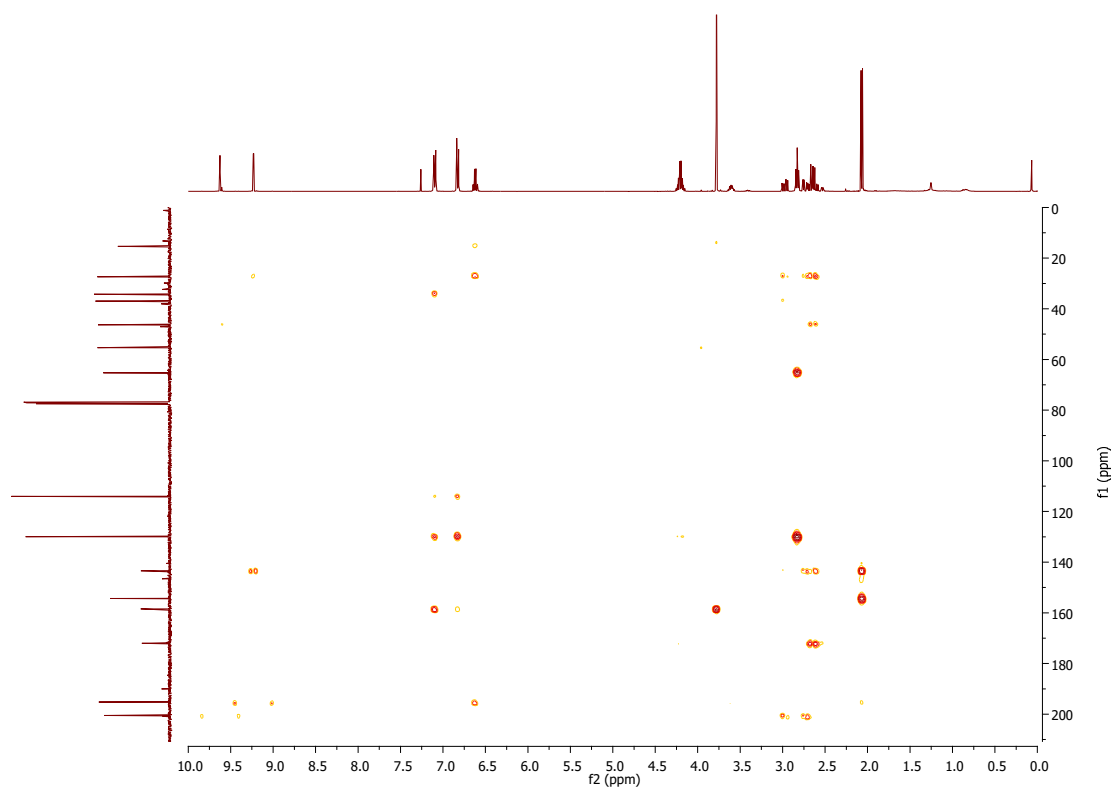

**Figure S6.**  $^1\text{H}$ - $^{13}\text{C}$  NMR (HMBC) of (-)-methyl-oleocanthal (**Met-OLE**) in deuterated chloroform.

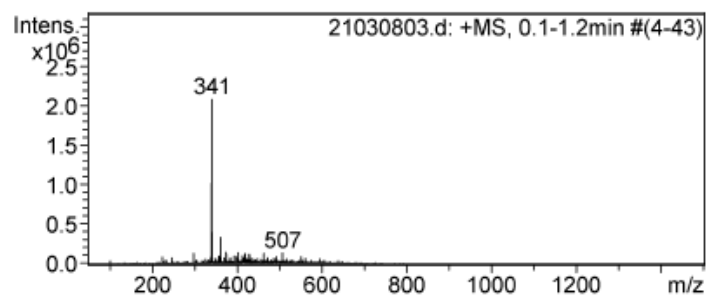

**Figure S7.** ESI-MS of (-)-methyl-oleocanthal (**Met-OLE**).

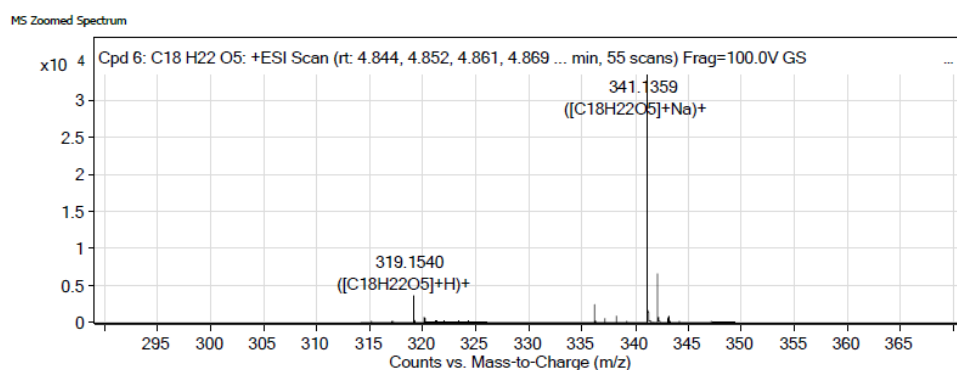

**Figure S8.** HRMS of (-)-methyl-oleocanthal (**Met-OLE**).

(-)-Methyl-ligustroside

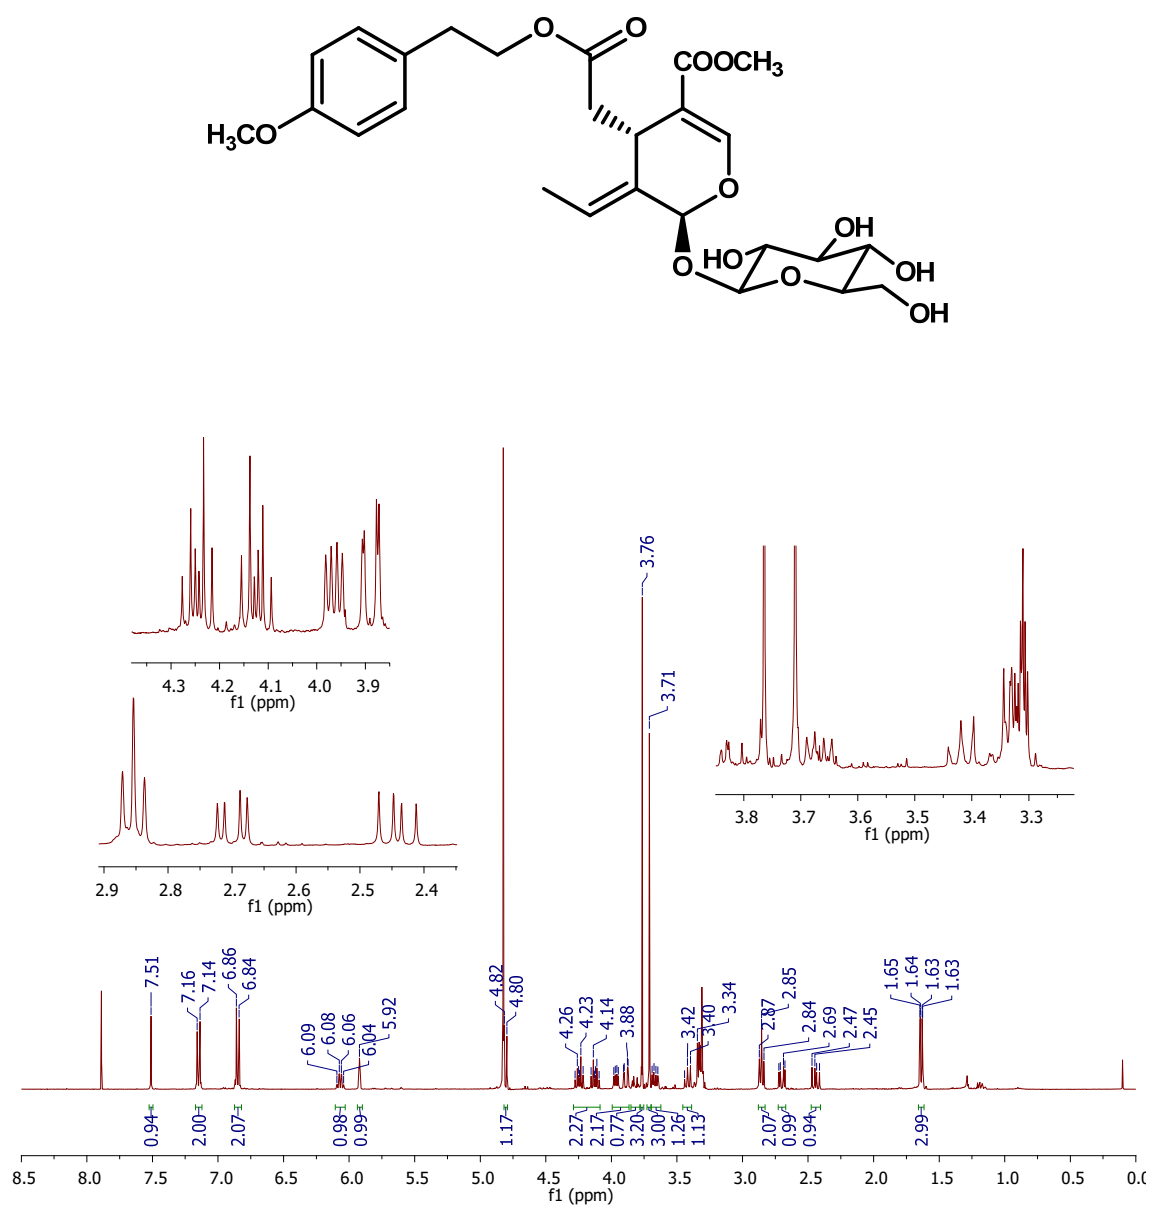

**Figure S9.**  $^1\text{H}$  NMR of (-)-methyl-ligustroside in deuterated chloroform.

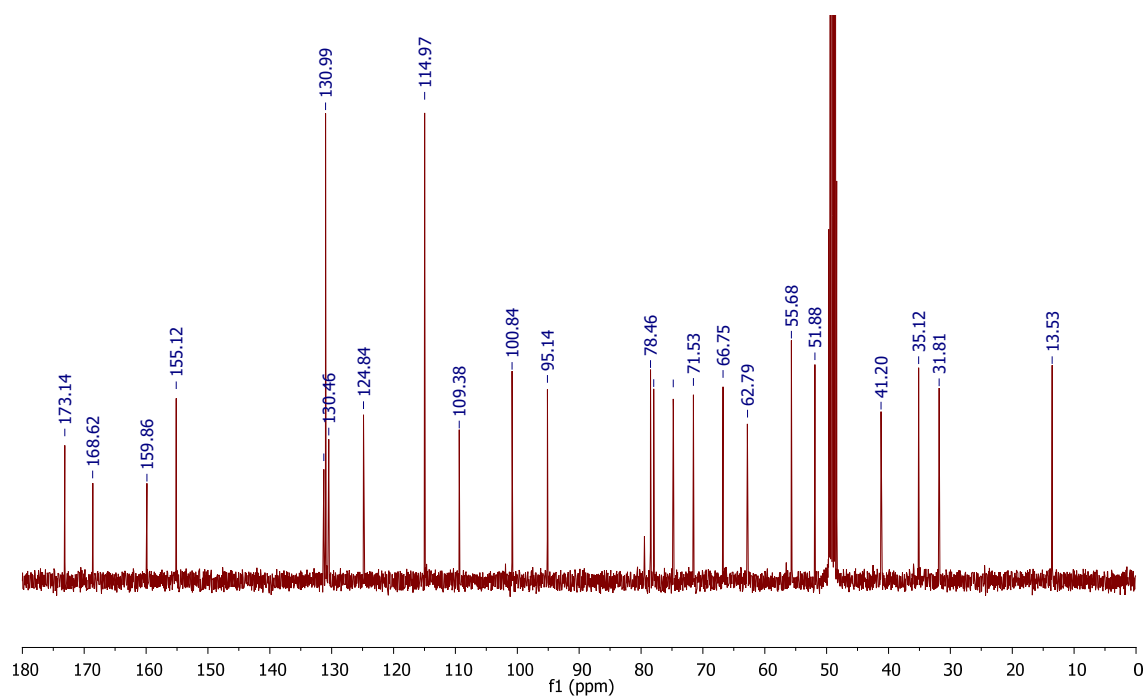

**Figure S10.**  $^{13}\text{C}$  NMR of (-)-methyl-ligustroside in deuterated chloroform.

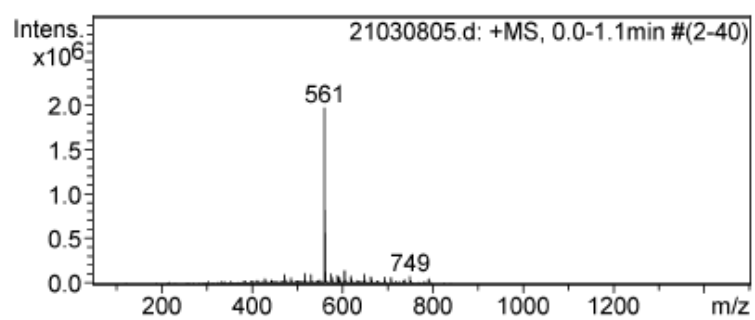

**Figure S11.** ESIMS of (-)-methyl-ligustroside.
